# Supplementary material
Source: PubMed Central journal article supplement (PMC4042874)
Supplement: supp_djt271_jnci_JNCI_13_0243_s02.pdf [file supp_djt271_jnci_JNCI_13_0243_s02.pdf]

**Supplementary Tables**

**Table S1.**Synbindin level and clinicopathological features of gastric cancer patients.

| Synbindin staining intensity* | Sex    | Age | Distant metastasis              | Microscopic grading | Tumor volume (mL) | Borrmann type | Invasion to vessels | Lymph nodes (total) | Lymph nodes (+) | T   | M   | N  | AJCC stage | Survival time (months) | Living status |
|-------------------------------|--------|-----|---------------------------------|---------------------|-------------------|---------------|---------------------|---------------------|-----------------|-----|-----|----|------------|------------------------|---------------|
| 1                             | Male   | 68  |                                 | III                 | 71.5              | 3             | Lymphatic vessel    | 14                  | 6               | T3  | N2  | M0 | 3A         | 26                     | deceased      |
| 1                             | Male   | 57  |                                 | III                 | 27                | 3             |                     | 16                  | 8               | T3  | N3a | M0 | 3B         | 39                     | deceased      |
| 1                             | Male   | 59  |                                 | II                  | 30                | 3             |                     | 11                  | 4               | T3  | N2  | M0 | 3A         | 24                     | deceased      |
| 1                             | Male   | 73  |                                 | III                 | 48                | 3             |                     | 5                   | 4               | T3  | N2  | M0 | 3A         | 61                     | alive         |
| 1                             | Female | 62  |                                 | III                 | 250               | 3             |                     | 16                  | 16              | T3  | N3b | M0 | 3B         | 27                     | deceased      |
| 1                             | Female | 83  |                                 | II                  | 66                | 3             |                     | 7                   | 0               | T3  | N0  | M0 | 2A         | 35                     | deceased      |
| 1                             | Female | 72  |                                 | II                  | 42.25             | 3             |                     | 10                  | 10              | T3  | N3a | M0 | 3B         | 42                     | deceased      |
| 1                             | Male   | 58  |                                 | III                 | 5.28              | 2             |                     | 14                  | 0               | T2  | N0  | M0 | 1B         | 59                     | alive         |
| 1                             | Male   | 65  |                                 | III                 | 21                | 4             |                     | 6                   | 6               | T4b | N2  | M0 | 3C         | 2                      | deceased      |
| 1                             | Male   | 48  |                                 | I                   | 0.5               | 1             |                     | 11                  | 0               | T1  | N0  | M0 | 1A         | 29                     | deceased      |
| 1                             | Male   | 67  |                                 | III                 | 96                | 4             |                     | 15                  | 12              | T3  | N2  | M0 | 3B         | 30                     | deceased      |
| 1                             | Male   | 68  |                                 | III                 | 154               | 4             |                     | 14                  | 9               | T3  | N2  | M0 | 3B         | 10                     | deceased      |
| 1                             | Male   | 62  | Pancreatic                      | II-III              | 28                | 4             |                     | 11                  | 11              | T4  | N2  | M0 | 4          | 69                     | deceased      |
| 2                             | Male   | 71  |                                 | III                 | 3.6               | 4             |                     | 2                   | 0               | T4b | N0  | M0 | 3B         | 28                     | deceased      |
| 2                             | Male   | 63  |                                 | II                  | 144               | 3             |                     | 17                  | 0               | T3  | N0  | M0 | 2A         | 63                     | alive         |
| 2                             | Male   | 53  |                                 | II-III              | 19.25             | 3             |                     | 20                  | 1               | T3  | N1  | M0 | 2B         | 9                      | deceased      |
| 2                             | Male   | 50  |                                 | III                 | 54.6              | 4             |                     | 21                  | 9               | T4a | N3a | M0 | 3C         | 10                     | deceased      |
| 2                             | Female | 77  |                                 | III                 | 42                | 3             |                     | 18                  | 1               | T3  | N1  | M0 | 2B         | 9                      | deceased      |
| 2                             | Male   | 80  |                                 | III                 | 49.5              | 3             |                     | 7                   | 4               | T3  | N2  | M0 | 3A         | 6                      | deceased      |
| 2                             | Male   | 65  |                                 | II-III              | 26                | 3             |                     | 6                   | 0               | T3  | N0  | M0 | 2A         | 5                      | deceased      |
| 2                             | Female | 79  |                                 | II-III              |                   | 3             |                     | 3                   | 1               | T3  | N1  | M0 | 2B         | 14                     | deceased      |
| 2                             | Male   | 81  |                                 | II                  | 112.5             | 4             |                     | 7                   | 3               | T4a | N2  | M0 | 3B         | 62                     | alive         |
| 2                             | Male   | 67  |                                 | III                 | 30.375            | 4             |                     | 7                   | 2               | T4a | N1  | M0 | 3A         | 62                     | alive         |
| 2                             | Male   | 71  |                                 | III                 | 136.5             | 3             |                     | 23                  | 22              | T3  | N3b | M0 | 3B         | 11                     | deceased      |
| 2                             | Female | 53  |                                 | III                 | 22.5              | 4             |                     |                     |                 | T4a | N0  | M0 | 2B         | 28                     | deceased      |
| 2                             | Male   | 63  |                                 | III                 | 17.5              | 4             |                     | 12                  | 6               | T4a | N2  | M0 | 3B         | 62                     | alive         |
| 2                             | Male   | 63  |                                 | II                  | 16                | 3             |                     | 10                  | 0               | T3  | N0  | M0 | 2A         | 62                     | alive         |
| 2                             | Male   | 69  |                                 | III                 | 32                | 3             |                     | 13                  | 9               | T3  | N3a | M0 | 3B         | 61                     | alive         |
| 2                             | Male   | 82  |                                 | III                 | 24                | 3             |                     | 4                   | 4               | T3  | N2  | M0 | 3A         | 44                     | deceased      |
| 2                             | Male   | 61  |                                 | II-III              | 8                 | 3             |                     | 5                   | 0               | T3  | N0  | M0 | 2A         | 61                     | alive         |
| 2                             | Male   | 55  |                                 | II                  | 37.125            | 3             |                     | 5                   | 3               | T3  | N2  | M0 | 3A         | 61                     | alive         |
| 2                             | Female | 65  |                                 | II                  | 160               | 2             |                     | 22                  | 1               | T2  | N1  | M0 | 2A         | 24                     | deceased      |
| 2                             | Female | 53  |                                 | II-III              | 9                 | 3             |                     | 3                   | 0               | T3  | N0  | M0 | 2A         | 34                     | deceased      |
| 2                             | Male   | 62  |                                 | III                 | 105               | 3             |                     | 20                  | 10              | T3  | N3a | M0 | 3B         | 60                     | alive         |
| 2                             | Male   | 62  |                                 | III                 | 20                | 2             |                     | 15                  | 11              | T2  | N3a | M0 | 3A         | 60                     | alive         |
| 2                             | Male   | 73  |                                 | II                  | 7.2               | 3             |                     | 3                   | 1               | T3  | N1  | M0 | 2B         | 60                     | alive         |
| 2                             | Female | 69  |                                 | III                 | 32                | 3             |                     | 16                  | 14              | T3  | N3a | M0 | 3B         | 15                     | deceased      |
| 2                             | Male   | 58  |                                 | III                 | 20                | 3             | Lymphatic vessel    | 15                  | 13              | T3  | N3a | M0 | 3B         | 15                     | deceased      |
| 2                             | Male   | 58  |                                 | II-III              | 33                | 3             |                     | 9                   | 5               | T3  | N2  | M0 | 3A         | 11                     | deceased      |
| 2                             | Male   | 49  |                                 | III                 | 40.5              | 3             |                     | 13                  | 8               | T3  | N3a | M0 | 3B         | 59                     | deceased      |
| 2                             | Male   | 61  |                                 | III                 | 11.2              | 2             |                     | 4                   | 4               | T2  | N2  | M0 | 2B         | 59                     | deceased      |
| 2                             | Male   | 45  |                                 | III                 | 32                | 3             |                     | 9                   | 4               | T3  | N2  | M0 | 3A         | 27                     | deceased      |
| 2                             | Male   | 67  |                                 | III                 | 30                | 4             |                     | 17                  | 1               | T4a | N1  | M0 | 3A         | 31                     | deceased      |
| 2                             | Male   | 71  |                                 | II                  | 25                | 3             |                     | 4                   | 0               | T3  | N0  | M0 | 2A         | 39                     | deceased      |
| 2                             | Male   | 79  |                                 | II-III              | 3.25              | 3             |                     | 14                  | 4               | T3  | N2  | M0 | 3A         | 1                      | deceased      |
| 2                             | Male   | 76  |                                 | II                  | 11.25             | 2             |                     | 13                  | 4               | T2  | N2  | M0 | 2B         | 27                     | deceased      |
| 2                             | Female | 36  |                                 | III                 | 17.16             | 3             |                     | 19                  | 0               | T2  | N0  | M0 | 1B         | 75                     | alive         |
| 2                             | Male   | 69  |                                 | II                  | 13.75             | 2             |                     | 16                  | 5               | T2  | N1  | M0 | 2          | 50                     | alive         |
| 2                             | Male   | 50  |                                 | III                 | 30                | 4             |                     | 8                   | 5               | T3  | N1  | M0 | 3A         | 24                     | deceased      |
| 2                             | Male   | 68  | Pancreatic                      | III                 | 63                | 4             |                     | 7                   | 1               | T4  | N1  | M0 | 3B         | 20                     | deceased      |
| 2                             | Male   | 72  |                                 | III                 | 9                 | 3             |                     | 18                  | 7               | T3  | N2  | M0 | 3B         | 17                     | deceased      |
| 2                             | Male   | 77  | Greater omentum                 | II-III              | 7.5               | 4             |                     | 11                  | 5               | T4  | N1  | M0 | 3B         | 14                     | deceased      |
| 2                             | Male   | 71  | Hepatic                         | II                  | 10.89             | 4             |                     | 10                  | 6               | T3  | N1  | M1 | 4          | 5                      | deceased      |
| 2                             | Female | 67  |                                 | III                 | 8.75              | 4             |                     | 22                  | 21              | T3  | N3  | M0 | 4          | 15                     | deceased      |
| 2                             | Male   | 64  | Esophageal                      | III                 | 102               | 4             |                     | 17                  | 13              | T4  | N2  | M0 | 4          | 12                     | deceased      |
| 2                             | Male   | 61  | Renal fascia                    | III                 | 45.5              | 4             |                     | 23                  | 16              | T4  | N3  | M1 | 4          | 4                      | deceased      |
| 3                             | Male   | 47  |                                 | III                 | 161.5             | 3             | Lymphatic vessel    | 35                  | 9               | T3  | N3a | M0 | 3B         | 29                     | deceased      |
| 3                             | Male   | 57  |                                 | II-III              | 33.75             | 3             |                     | 10                  | 5               | T3  | N2  | M0 | 3A         | 63                     | alive         |
| 3                             | Male   | 54  |                                 | II                  | 17.5              | 3             |                     | 2                   | 2               | T3  | N1  | M0 | 2B         | 0                      | deceased      |
| 3                             | Female | 65  |                                 | III                 | 12                | 3             |                     | 11                  | 0               | T3  | N0  | M0 | 2A         | 23                     | deceased      |
| 3                             | Male   | 79  |                                 | III                 | 180               | 3             | Lymphatic vessel    | 5                   | 1               | T3  | N1  | M0 | 2B         | 63                     | alive         |
| 3                             | Female | 41  |                                 | III                 | 40.5              | 3             |                     | 18                  | 1               | T3  | N1  | M0 | 2B         | 43                     | deceased      |
| 3                             | Male   | 63  |                                 | II-III              | 54                | 3             |                     | 4                   | 4               | T3  | N2  | M0 | 3A         | 35                     | deceased      |
| 3                             | Male   | 63  |                                 | III                 | 390               | 3             |                     | 18                  | 15              | T3  | N3a | M0 | 3B         | 62                     | alive         |
| 3                             | Female | 59  |                                 | III                 | 6                 | 3             |                     | 19                  | 3               | T3  | N2  | M0 | 3A         | 32                     | deceased      |
| 3                             | Female | 72  |                                 | III                 | 48.75             | 4             |                     | 12                  | 6               | T4a | N2  | M0 | 3B         | 21                     | deceased      |
| 3                             | Female | 62  |                                 | III                 | 35.75             | 4             |                     | 15                  | 7               | T4a | N3a | M0 | 3C         | 61                     | deceased      |
| 3                             | Female | 75  |                                 | III                 | 5.4               | 3             |                     | 11                  | 2               | T2  | N1  | M0 | 2A         | 61                     | deceased      |
| 3                             | Female | 68  |                                 | II                  | 50                | 3             |                     | 11                  | 0               | T3  | N0  | M0 | 2A         | 46                     | deceased      |
| 3                             | Female | 34  |                                 | II-III              |                   | 3             | Lymphatic vessel    | 20                  | 0               | T2  | N0  | M0 | 1B         | 15                     | deceased      |
| 3                             | Male   | 68  | Biliary tract                   | III                 | 108               | 3             | Lymphatic vessel    | 7                   | 7               | T3  | N3a | M1 | 4          | 5                      | deceased      |
| 3                             | Female | 79  |                                 | II                  | 37.5              | 3             |                     | 1                   | 1               | T3  | N1  | M0 | 2B         | 60                     | deceased      |
| 3                             | Male   | 63  |                                 | III                 | 20                | 3             |                     | 9                   | 4               | T3  | N2  | M0 | 3A         | 60                     | deceased      |
| 3                             | Male   | 50  |                                 | III                 | 117               | 3             |                     | 22                  | 19              | T3  | N3b | M0 | 3B         | 59                     | deceased      |
| 3                             | Male   | 45  |                                 | III                 | 45                | 4             |                     | 12                  | 0               | T4a | N0  | M0 | 2B         | 36                     | deceased      |
| 3                             | Female | 72  |                                 | III                 | 7                 | 3             |                     | 16                  | 14              | T3  | N3a | M0 | 3B         | 17                     | deceased      |
| 3                             | Male   | 78  |                                 | II                  | 63                | 2             | Lymphatic vessel    | 14                  | 0               | T2  | N0  | M0 | 1B         | 55                     | deceased      |
| 3                             | Male   | 57  | Pelvic cavity                   | III                 | 520               | 4             |                     | 17                  | 17              | T4a | N3b | M1 | 4          | 13                     | deceased      |
| 3                             | Male   | 79  |                                 | II                  | 30                | 3             |                     | 20                  | 4               | T3  | N2  | M0 | 3A         | 11                     | deceased      |
| 3                             | Male   | 49  | Pancreatic                      | III                 |                   | 1             |                     | 10                  | 0               | T1  | N0  | M0 | 1A         | 14                     | deceased      |
| 3                             | Male   | 41  |                                 | II                  | 200               | 2             |                     | 42                  | 0               | T2  | N0  | M0 | 1B         | 12                     | deceased      |
| 3                             | Male   | 71  | Retroperitoneal                 | II                  | 1.8               | 4             |                     | 6                   | 2               | T2  | N1  | M0 | 2          | 10                     | deceased      |
| 3                             | Female | 52  | Pancreatic                      | III                 |                   | 3             |                     | 11                  | 0               | T3  | N0  | M0 | 2          | 55                     | deceased      |
| 3                             | Male   | 53  | Spleen                          | III                 | 90                | 4             |                     | 17                  | 0               | T3  | N0  | M0 | 2          | 26                     | deceased      |
| 3                             | Female | 79  |                                 | II                  | 9                 | 4             |                     | 11                  | 2               | T3  | N1  | M0 | 3A         | 14                     | deceased      |
| 3                             | Female | 82  |                                 | II                  | 45                | 4             |                     | 16                  | 8               | T3  | N2  | M0 | 3B         | 10                     | deceased      |
| 3                             | Male   | 69  | Hepatic                         | II                  | 39                | 4             |                     | 23                  | 12              | T3  | N2  | M0 | 3B         | 37                     | deceased      |
| 3                             | Male   | 55  | Retroperitoneal                 | II-III              | 20                | 4             |                     | 18                  | 11              | T3  | N2  | M0 | 3B         | 7                      | deceased      |
| 3                             | Female | 67  |                                 | III                 | 16                | 4             |                     | 11                  | 7               | T3  | N2  | M0 | 3B         | 21                     | deceased      |
| 3                             | Male   | 70  | Hepatic                         | III                 | 1500              | 4             |                     | 20                  | 20              | T3  | N3  | M1 | 4          | 6                      | deceased      |
| 3                             | Male   | 44  |                                 | III                 | 11.5              | 4             |                     | 21                  | 21              | T3  | N3  | M0 | 4          | 8                      | deceased      |
| 3                             | Female | 43  |                                 | III                 | 64                | 4             |                     | 24                  | 16              | T3  | N3  | M0 | 4          | 8                      | deceased      |
| 3                             | Male   | 72  |                                 | III                 |                   | 4             | Lymphatic vessel    | 19                  | 19              | T3  | N3  | M0 | 4          | 16                     | deceased      |
| 3                             | Female | 51  | Greater omentum, thoracic aorta | III                 | 216               | 4             |                     | 26                  | 26              | T4  | N3  | M1 | 4          | 20                     | deceased      |
| 4                             | Male   | 75  | Hepatic                         | III                 | 180               | 4             | Lymphatic vessel    | 23                  | 8               | T4a | N3a | M1 | 4          | 26                     | deceased      |
| 4                             | Female | 65  |                                 | II                  | 220               | 3             |                     | 17                  | 1               | T3  | N1  | M0 | 2B         | 37                     | deceased      |
| 4                             | Male   | 59  |                                 | II                  | 45                | 3             |                     | 20                  | 15              | T3  | N3a | M0 | 3B         | 39                     | deceased      |
| 4                             | Male   | 72  |                                 | II                  | 60                | 3             |                     | 10                  | 8               | T3  | N3a | M0 | 3B         | 16                     | deceased      |
| 4                             | Male   | 69  |                                 | III                 | 81                | 3             |                     | 14                  | 14              | T3  | N3a | M0 | 3B         | 10                     | deceased      |
| 4                             | Male   | 80  |                                 | III                 | 84                | 4             |                     | 17                  | 6               | T4a | N2  | M0 | 3B         | 43                     | deceased      |
| 4                             | Male   | 75  |                                 | III                 | 21                | 4             |                     | 29                  | 6               | T4a | N2  | M0 | 3B         | 25                     | deceased      |
| 4                             | Female | 75  |                                 | III                 | 117               | 3             |                     | 19                  | 4               | T3  | N2  | M0 | 3A         | 55                     | deceased      |
| 4                             | Male   | 63  | Retroperitoneal                 | II                  | 72                | 4             |                     | 17                  | 5               | T3  | N1  | M0 | 3A         | 26                     | deceased      |
| 4                             | Female | 56  |                                 | II-III              | 15                | 4             |                     | 12                  | 9               | T3  | N2  | M0 | 3B         | 40                     | deceased      |
| 4                             | Male   | 33  |                                 | III                 | 15.2              | 4             |                     | 13                  | 12              | T3  | N2  | M0 | 3B         | 8                      | deceased      |
| 4                             | Male   | 62  |                                 | II-III              | 97.5              | 4             |                     | 48                  | 38              | T3  | N3  | M0 | 4          | 21                     | deceased      |
| 4                             | Female | 75  | Greater omentum                 | III                 |                   | 4             |                     | 22                  | 21              | T4  | N3  | M0 | 4          | 12                     | deceased      |
| 4                             | Male   | 68  |                                 | III                 | 800               | 4             |                     | 21                  | 16              | T3  | N3  | M0 | 4          | 15                     | deceased      |
| 4                             | Male   | 53  |                                 | III                 | 240               | 4             |                     | 20                  | 17              | T3  | N3  | M0 | 4          | 11                     | deceased      |
| 4                             | Female | 48  | Spread to bones                 | III                 | 42.25             | 4             |                     | 23                  | 21              | T3  | N3  | M0 | 4          | 16                     | deceased      |
| 4                             | Male   | 73  | Hepatic                         | II-III              | 58.5              | 4             |                     | 9                   | 2               | T3  | N1  | M1 | 4          | 24                     | deceased      |
| 4                             | Male   | 73  |                                 | II-III              | 2.25              | 4             |                     | 18                  | 15              | T3  | N3  | M0 | 4          | 25                     | deceased      |
| 4                             | Male   | 49  |                                 | III                 | 15                | 4             |                     | 17                  | 16              | T3  | N3  | M0 | 4          | 26                     | deceased      |
| 4                             | Male   | 82  | Hepatic                         | II-III              | 150               | 3             |                     | 5                   | 0               | T2  | N0  | M1 | 4          | 33                     | deceased      |
| 4                             | Male   | 27  | Pancreatic, hepatic             | II-III              | 360               | 4             |                     | 10                  | 10              | T3  | N2  | M1 | 4          | 13                     | deceased      |
| 4                             | Female |     |                                 |                     |                   |               |                     |                     |                 |     |     |    |            |                        |               |
