# Supplementary material
Source: PubMed Central journal article supplement (PMC4042874)
Supplement: supp_djt271_jnci_JNCI_13_0243_s03.pdf [file supp_djt271_jnci_JNCI_13_0243_s03.pdf]

**Table S2.** Synbindin regulates the ERK/MAPK, which is activated gastric cancers.

| <b>ERK/MAPK related genes</b> |                             |            |                       |              |                                                    |
|-------------------------------|-----------------------------|------------|-----------------------|--------------|----------------------------------------------------|
| <b>Gene<br/>Symbol</b>        | <b>Synbindin expression</b> |            | <b>Gastric cancer</b> |              | <b>Relevance to MAPK pathway and cell survival</b> |
|                               | <b>P-value*</b>             | <b>FC*</b> | <b>P-value</b>        | <b>FC***</b> |                                                    |
| ACTG2                         | 0.033                       | 2.590      | 0.017                 | 1.563        | phosphorylated by ERK                              |
| DUSP5                         | 0.040                       | 1.680      | 0.001                 | 1.577        | phosphorylated by ERK                              |
| SEPT7L                        | 0.049                       | 1.950      | 0.008                 | 1.072        | phosphorylated by ERK                              |
| HNRNPA3                       | 0.017                       | 2.360      | 0.033                 | 1.117        | putative ERK-regulated gene                        |
| IGFBP3                        | 0.046                       | 1.570      | 0.002                 | 1.629        | expression regulated by ERK                        |
| TLR4                          | 0.003                       | 1.640      | 0.041                 | 1.765        | dependent on MSK, downstream of ERK                |
| SRP19                         | 0.013                       | 1.880      | 0.225                 | 0.892        | ribonucleoprotein regulated by ERK                 |
| PPM1H                         | 0.019                       | 2.020      | 0.438                 | 0.796        | affects HER phosphorylation, downstream of ERK     |
| OLR1                          | 0.046                       | 1.540      | 0.000                 | 2.120        | initiates ERK activation                           |
| RNASEL                        | 0.047                       | 2.300      | 0.025                 | 1.631        | required for ERK activation by LPS                 |
| EDN1                          | 0.038                       | 1.870      | 0.401                 | 1.147        | activates ERK                                      |
| RSU1                          | 0.029                       | 1.620      | 0.434                 | 0.791        | enhances ERK activation and inhibits JNK           |
| EDN2                          | 0.030                       | 1.510      | 0.683                 | 1.138        | chemotaxis towards EDN2 is via ERK                 |
| NRG1                          | 0.021                       | 1.510      | 0.024                 | 1.602        | activates ERK                                      |
| COL8A1                        | 0.003                       | 1.860      | 0.025                 | 1.402        | promotes proliferation and ERK phosphorylation     |
| RASAL2                        | 0.048                       | 1.830      | 0.394                 | 0.774        | activates Ras                                      |
| EREG                          | 0.016                       | 2.090      | 0.709                 | 0.895        | MEK-dependent expression                           |
| TCP1                          | 0.031                       | 1.650      | 0.000                 | 1.749        | targets for RSK in the Ras-MAPK Pathway            |
| ZMYND11                       | 0.025                       | 1.540      | 0.030                 | 0.847        | interacts with MAP3K7IP1                           |
| GBP1                          | 0.002                       | 1.780      | 0.313                 | 1.569        | p38-dependent expression                           |
| ATF3                          | 0.028                       | 2.230      | 0.180                 | 0.848        | p38-dependent expression                           |
| SH3RF2                        | 0.026                       | 1.690      | 0.209                 | 0.718        | promotes cell survival                             |
| ADAM12                        | 0.021                       | 1.810      | 0.003                 | 0.749        | confer proliferation advantage                     |
| MICAL1                        | 0.028                       | 1.870      | 0.587                 | 0.921        | inhibits apoptosis                                 |
| <i>GADD45G</i>                | 0.003                       | 0.420      | 0.037                 | 0.709        | <i>Induces cell cycle arrest</i>                   |
| <i>PTPN5</i>                  | 0.021                       | 0.370      | 0.000                 | 0.322        | <i>Induces apoptosis, inhibited by ERK2</i>        |
| <i>TNFSF10</i>                | 0.012                       | 0.660      | 0.014                 | 1.353        | <i>Induces apoptosis</i>                           |

| <b>Genes related to neuronal cell function and Golgi structure</b> |                             |           |                       |           |                                                                |
|--------------------------------------------------------------------|-----------------------------|-----------|-----------------------|-----------|----------------------------------------------------------------|
| <b>Gene<br/>Symbol</b>                                             | <b>Synbindin expression</b> |           | <b>Gastric cancer</b> |           | <b>Relevance to neuronal cell function and Golgi structure</b> |
|                                                                    | <b>P-value</b>              | <b>FC</b> | <b>P-value</b>        | <b>FC</b> |                                                                |
| VAMP1                                                              | 0.031                       | 1.510     | 0.875                 | 1.050     | transport of synaptic vesicles                                 |
| NAV1                                                               | 0.006                       | 1.560     | 0.907                 | 1.018     | involved in axon guidance                                      |
| RSPO3                                                              | 0.038                       | 1.770     | 0.305                 | 0.745     | binds to syndecan and induces Wnt signaling                    |
| NF2                                                                | 0.025                       | 1.660     | 0.578                 | 1.147     | affects development of Schwann cells                           |
| SERPINI1                                                           | 0.021                       | 1.530     | 0.159                 | 0.610     | regulates neuronal survival, tumor associated                  |
| CEP350                                                             | 0.030                       | 1.890     | 0.436                 | 1.101     | stabilises Golgi-associated microtubules                       |
| <i>NPSR1</i>                                                       | 0.020                       | 0.660     | 0.086                 | 0.895     | <i>Inhibits cell growth</i>                                    |
| <i>CALY</i>                                                        | 0.045                       | 0.470     | 0.087                 | 2.325     | <i>Neuron-specific vesicular protein</i>                       |
| <i>TACR1</i>                                                       | 0.001                       | 0.300     | 0.090                 | 0.486     | <i>G protein receptor in nervous system</i>                    |

| <b>Other genes</b>     |                             |           |                       |           |                                                                                                                         |
|------------------------|-----------------------------|-----------|-----------------------|-----------|-------------------------------------------------------------------------------------------------------------------------|
| <b>Gene<br/>Symbol</b> | <b>Synbindin expression</b> |           | <b>Gastric cancer</b> |           | <b>Description</b>                                                                                                      |
|                        | <b>P-value</b>              | <b>FC</b> | <b>P-value</b>        | <b>FC</b> |                                                                                                                         |
| CHST11                 | 0.039                       | 1.599     | 0.150                 | 1.238     | Homo sapiens carbohydrate (chondroitin 4) sulfotransferase 11 (CHST11), transcript variant 1, mRNA                      |
| PAFAH2                 | 0.041                       | 1.660     | 0.203                 | 0.829     | Homo sapiens platelet-activating factor acetylhydrolase 2, 40kDa (PAFAH2), mRNA [NM_000437]                             |
| HS3ST3B1               | 0.041                       | 1.641     | 0.639                 | 0.905     | heparan sulfate (glucosamine) 3-O-sulfotransferase 3B1 [Source:HGNC Symbol;Acc:5198]                                    |
| BTN3A1                 | 0.039                       | 1.522     | 0.754                 | 0.936     | Homo sapiens butyrophilin, subfamily 3, member A1 (BTN3A1), transcript variant 1, mRNA [NM_007048]                      |
| LNPEP                  | 0.042                       | 1.569     | 0.381                 | 0.564     | Homo sapiens leucyl/cystinyl aminopeptidase (LNPEP), transcript variant 1, mRNA [NM_005575]                             |
| LRRC15                 | 0.045                       | 1.700     | 0.088                 | 0.621     | Homo sapiens leucine rich repeat containing 15 (LRRC15), transcript variant 2, mRNA [NM_130830]                         |
| RBBP9                  | 0.042                       | 1.555     | 0.152                 | 1.161     | Homo sapiens retinoblastoma binding protein 9 (RBBP9), mRNA [NM_006606]                                                 |
| ATP1A1OS               | 0.045                       | 1.668     | 0.009                 | 0.530     | Homo sapiens ATP1A1 opposite strand (ATP1A1OS), transcript variant 3, non-coding RNA [NR_024126]                        |
| C11orf96               | 0.041                       | 1.522     | 0.310                 | 0.822     | Homo sapiens chromosome 11 open reading frame 96 (C11orf96), mRNA [NM_001145033]                                        |
| LOC728431              | 0.042                       | 1.552     | 0.694                 | 0.910     | Homo sapiens hypothetical LOC728431 (LOC728431), non-coding RNA [NR_038842]                                             |
| RFX3                   | 0.046                       | 1.602     | 0.854                 | 1.030     | Homo sapiens regulatory factor X, 3 (influences HLA class II expression) (RFX3), transcript variant 2, mRNA [NM_134428] |
| LOC147670              | 0.045                       | 1.627     | 0.361                 | 0.761     | Homo sapiens hypothetical protein LOC147670 (LOC147670), mRNA [NM_001193628]                                            |
| SLC44A2                | 0.048                       | 1.629     | 0.000                 | 0.510     | Homo sapiens solute carrier family 44, member 2 (SLC44A2), transcript variant 1, mRNA [NM_020428]                       |
| SPINK13                | 0.048                       | 1.640     | 0.000                 | 0.327     | Homo sapiens serine peptidase inhibitor, Kazal type 13 (putative) (SPINK13), mRNA [NM_001040129]                        |
| CROT                   | 0.048                       | 1.652     | 0.001                 | 0.611     | Homo sapiens carnitine O-octanoyltransferase (CROT), transcript variant 2, mRNA [NM_021151]                             |
| MTMR11                 | 0.045                       | 1.512     | 0.096                 | 1.310     | Homo sapiens myotubularin related protein 11 (MTMR11), transcript variant 2, mRNA [NM_181873]                           |
| USP32                  | 0.027                       | 1.619     | 0.907                 | 1.010     | Homo sapiens ubiquitin specific peptidase 32 (USP32), mRNA [NM_032582]                                                  |
| IL27RA                 | 0.024                       | 1.659     | 0.754                 | 0.914     | Homo sapiens interleukin 27 receptor, alpha (IL27RA), mRNA [NM_004843]                                                  |
| CDV3                   | 0.039                       | 1.612     | 0.091                 | 0.876     | Homo sapiens CDV3 homolog (mouse) (CDV3), transcript variant 2, mRNA [NM_017548]                                        |
| SHROOM1                | 0.039                       | 1.609     | 0.510                 | 0.872     | Homo sapiens shroom family member 1 (SHROOM1), transcript variant 2, mRNA [NM_133456]                                   |
| WHSC1L1                | 0.049                       | 1.600     | 0.910                 | 0.981     | Homo sapiens Wolf-Hirschhorn syndrome candidate 1-like 1 (WHSC1L1), transcript variant long, mRNA [NM_023034]           |
| TCTE3                  | 0.029                       | 1.598     | 0.001                 | 0.485     | Homo sapiens t-complex-associated-testis-expressed 3 (TCTE3), mRNA [NM_174910]                                          |
| LOC100233156           | 0.032                       | 1.589     | 0.013                 | 0.688     | Homo sapiens tektin 4 pseudogene (LOC100233156), transcript variant 1, non-coding RNA [NR_037871]                       |
| C20orf112              | 0.045                       | 1.588     | 0.066                 | 0.730     | Homo sapiens chromosome 20 open reading frame 112 (C20orf112), mRNA [NM_080616]                                         |
| SNORA73A               | 0.046                       | 1.588     | 0.454                 | 0.543     | Homo sapiens small nucleolar RNA, H/ACA box 73A (SNORA73A), small nucleolar RNA [NR_002907]                             |
| SPINK5                 | 0.023                       | 1.583     | 0.000                 | 0.282     | Homo sapiens serine peptidase inhibitor, Kazal type 5 (SPINK5), transcript variant 1, mRNA [NM_001127698]               |
| LOC286071              | 0.048                       | 1.574     | 0.029                 | 0.585     | Homo sapiens cDNA FLJ34440 fis, clone HLUNG2001214. [AK091759]                                                          |
| LOC100128402           | 0.038                       | 1.568     | 0.560                 | 0.847     | Homo sapiens cDNA FLJ42583 fis, clone BRACE3009090. [AK124574]                                                          |
| PRUNE2                 | 0.048                       | 1.565     | 0.250                 | 0.820     | Homo sapiens prune homolog 2 (Drosophila) (PRUNE2), mRNA [NM_015225]                                                    |
| SATL1                  | 0.029                       | 1.561     | 0.230                 | 0.770     | Homo sapiens spermidine/spermine N1-acetyl transferase-like 1 (SATL1), mRNA [NM_001012980]                              |
| PSG8                   | 0.038                       | 1.558     | 0.340                 | 0.890     | Homo sapiens pregnancy specific beta-1-glycoprotein 8 (PSG8), transcript variant 1, mRNA [NM_182707]                    |
| BTBD7                  | 0.017                       | 1.558     | 0.100                 | 0.648     | Homo sapiens BTB (POZ) domain containing 7 (BTBD7), transcript variant 1, mRNA [NM_001002860]                           |
| BHLHE23                | 0.016                       | 1.550     | 0.200                 | 0.417     | Homo sapiens basic helix-loop-helix family, member e23 (BHLHE23), mRNA [NM_080606]                                      |
| ZBTB26                 | 0.034                       | 1.548     | 0.352                 | 1.229     | Homo sapiens zinc finger and BTB domain containing 26 (ZBTB26), mRNA [NM_020924]                                        |
| PTGES                  | 0.032                       | 1.546     | 0.563                 | 1.096     | Homo sapiens prostaglandin E synthase (PTGES), mRNA [NM_004878]                                                         |
| HSPA2                  | 0.026                       | 1.545     | 0.475                 | 0.917     | Homo sapiens heat shock 70kDa protein 2 (HSPA2), mRNA [NM_021979]                                                       |
| HNRNPUL2               | 0.037                       | 1.545     | 0.895                 | 0.975     | Homo sapiens heterogeneous nuclear ribonucleoprotein U-like 2 (HNRNPUL2), mRNA [NM_001079559]                           |
| C1orf106               | 0.033                       | 1.541     | 0.089                 | 1.298     | Homo sapiens chromosome 1 open reading frame 106 (C1orf106), transcript variant 1, mRNA [NM_018265]                     |
| TMCC2                  | 0.020                       | 1.540     | 0.519                 | 0.842     | Homo sapiens transmembrane and coiled-coil domain family 2 (TMCC2), transcript variant 1, mRNA                          |
| RAB9BP1                | 0.046                       | 1.537     | 0.289                 | 0.694     | Homo sapiens RAB9B, member RAS oncogene family pseudogene 1 (RAB9BP1), non-coding RNA                                   |
| ARHGAP42               | 0.042                       | 1.532     | 0.200                 | 0.391     | Homo sapiens Rho GTPase activating protein 42 (ARHGAP42), mRNA [NM_152432]                                              |
| C6orf35                | 0.046                       | 1.531     | 0.897                 | 0.980     | Homo sapiens chromosome 6 open reading frame 35 (C6orf35), mRNA [NM_018452]                                             |
| KLHL13                 | 0.013                       | 1.530     | 0.001                 | 0.393     | Homo sapiens kelch-like 13 (Drosophila) (KLHL13), transcript variant 1, mRNA [NM_033495]                                |
| LOC339988              | 0.020                       | 1.530     | 0.086                 | 0.675     | Homo sapiens cDNA clone IMAGE:5217034. [BC041468]                                                                       |
| FERMT3                 | 0.021                       | 1.528     | 0.266                 | 0.779     | Homo sapiens fermitin family member 3 (FERMT3), transcript variant URP2LF, mRNA [NM_178443]                             |
| AVL9                   | 0.034                       | 1.524     | 0.893                 | 1.018     | Homo sapiens AVL9 homolog (S. cerevisiae) (AVL9), mRNA [NM_015060]                                                      |
| C3orf35                | 0.050                       | 1.520     | 0.080                 | 0.621     | Homo sapiens chromosome 3 open reading frame 35 (C3orf35), transcript variant B, mRNA [NM_178339]                       |
| TPD52L1                | 0.007                       | 1.510     | 0.000                 | 0.398     | Homo sapiens tumor protein D52-like 1 (TPD52L1), transcript variant 4, mRNA [NM_001003397]                              |
| INVS                   | 0.021                       | 1.510     | 0.160                 | 1.313     | Homo sapiens inversin (INVS), transcript variant 2, mRNA [NM_183245]                                                    |
| VKORC1                 | 0.024                       | 1.506     | 0.098                 | 1.164     | Homo sapiens cDNA FLJ43630 fis, clone SPLEN2030479. [AK125618]                                                          |

\*P value: student t-test.

\*\* The higher fold change values (FC) are marked by darker red color.

\*\*\* The fold change of genes in gastric cancers are calculated according to published microarray dataset (GSE13911 and GSE15460). The yellow color highlights significantly altered genes.
